# Supplementary material for: An agarose fluidic chip for high-throughput in toto organoid imaging
Source: Royal Society of Chemistry journal article supplement (doi:10.1039/d4lc00459k), 2024-12-17
Supplement: d4lc00459k1.pdf [file d4lc00459k1.pdf]

### **Electronic Supplementary Material**

1. Python code for automatic organoid detection.
2. Movie showing automatic sample detection in flow.
3. Image stacks of glioblastoma organoids mounted fixed in agarose vs. in flow recorded on the digitally scanned light-sheet microscope.
4. Image stack of a glioblastoma organoid in flow recorded on the Ultramicroscope II.
5. Image stack of a microglia-populated organoid recorded in flow on the digitally scanned light-sheet microscope.

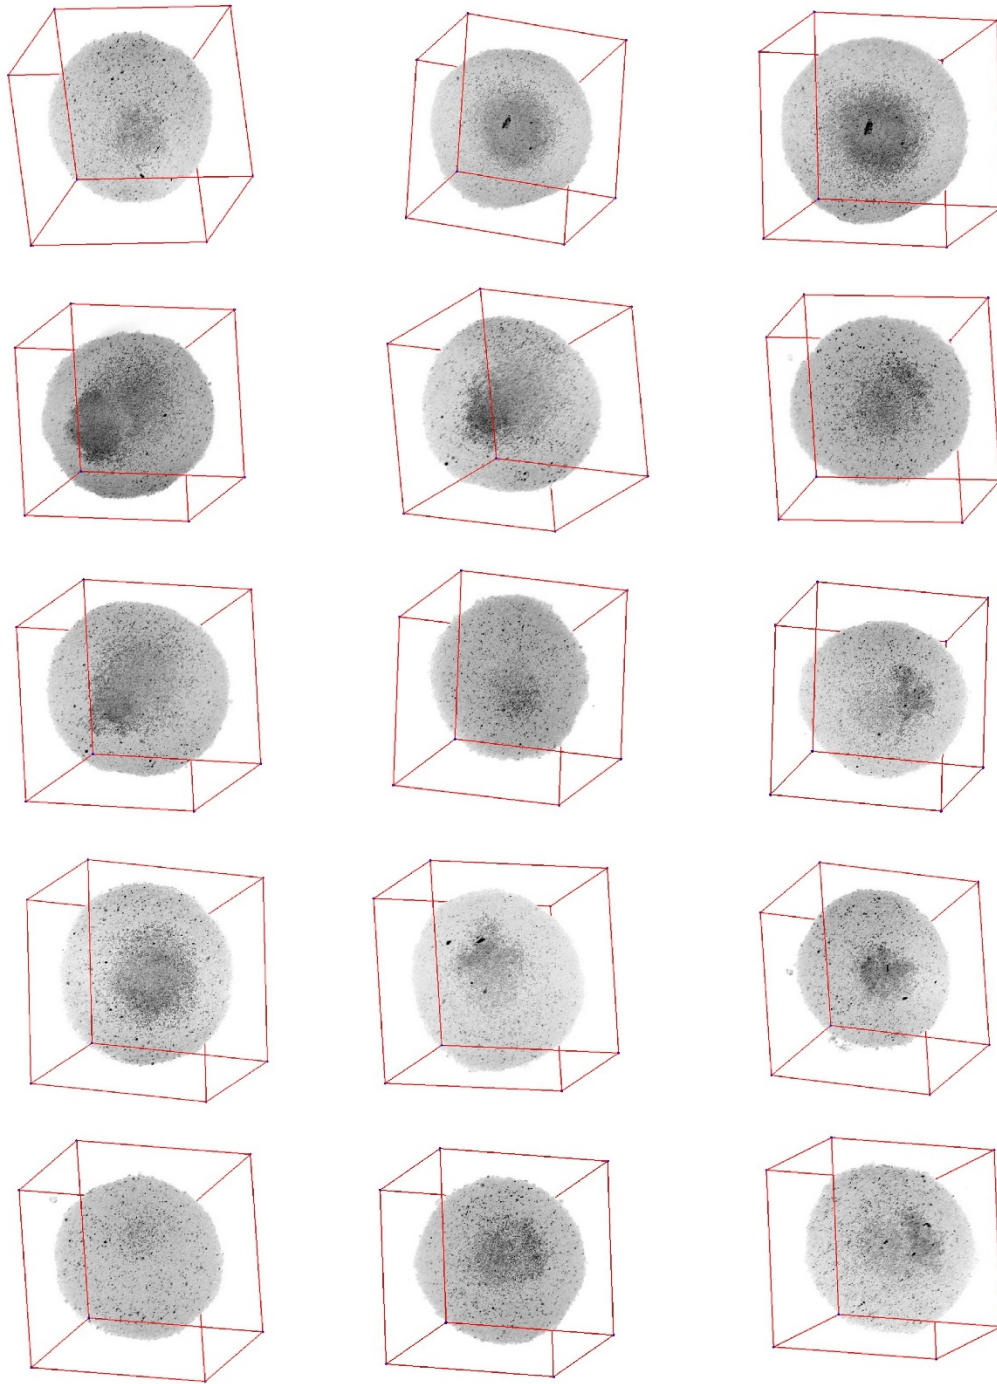

Supplementary figure 1 | 3D renders of glioblastoma spheroids with nuclear counterstain on the Leica SP8 DLS
